# Supplementary material for: Amyloid Structural Changes Studied by Infrared Microspectroscopy in Bigenic Cellular Models of Alzheimer’s Disease
Source: Int J Mol Sci. 2021 Mar 26;22(7):3430. doi: 10.3390/ijms22073430 (PMC8037084; doi:10.3390/ijms22073430)
Supplement: Supplementary file 1 [file ijms-22-03430-s001.pdf]

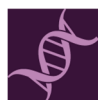

SUPPLEMENTARY INFORMATION

# Amyloid Structural Changes Studied by Infrared Microspectroscopy in Bigenic Cellular Models of Alzheimer's Disease

Agnes Paulus <sup>1,2</sup>, Anders Engdahl <sup>1</sup>, Yiyi Yang <sup>2</sup>, Antonio Boza-Serrano <sup>2</sup>, Sara Bachiller <sup>2</sup>, Laura Torres-Garcia <sup>3,4</sup>, Alexander Svanbergsson <sup>4</sup>, Megg G. Garcia <sup>2,3</sup>, Gunnar K. Gouras <sup>3</sup>, Jia-Yi Li <sup>4</sup>, Tomas Deierborg <sup>2,\*</sup> and Oxana Klementieva <sup>1,5,\*</sup>

- <sup>1</sup> Medical Microspectroscopy Laboratory, Department of Experimental Medical Science, Lund University, 22184 Lund, Sweden; agnieszka\_agnes.paulus@med.lu.se (A.P.); anders.engdahl@med.lu.se (A.E.)
- <sup>2</sup> Experimental Neuroinflammation Laboratory, Department of Experimental Medical Science, Lund University, 22184 Lund, Sweden; yiyi.yang@med.lu.se (Y.Y.); antonio.boza\_serrano@med.lu.se (A.B.-S.); sara.bachiller@med.lu.se (S.B.);
- <sup>3</sup> Experimental Dementia Research Unit, Department of Experimental Medical Science, Lund University, 22184 Lund, Sweden; megg.garcia@med.lu.se (M.G.G.); laura.torres-garcia@med.lu.se (L.T.-G.); gunnar.gouras@med.lu.se (G.K.G.)
- <sup>4</sup> Neural Plasticity and Repair Unit, Department of Experimental Medical Science, Lund University, 22184 Lund, Sweden; alexander.svanbergsson@med.lu.se (A.S.) jia-yi.li@med.lu.se (J.L.)
- <sup>5</sup> Lund Institute for Advanced Neutron and X-ray Science (LINXS), 22370 Lund, Sweden
- \* Correspondence: tomas.deierborg@med.lu.se (T.D.); oxana.klementieva@med.lu.se (O.K.)

**Citation:** Paulus, A.; Engdahl, A.; Yang, Y.; Boza-Serrano, A.; S. Bachiller; Torres-Garcia, L.; Svanbergsson, A.; Garcia, M.G.; Gouras, G.K.; Li, J.-Y.; et al. Amyloid Structural Changes Studied by Infrared Microspectroscopy in Bigenic Cellular Models of Alzheimer's Disease. *Int. J. Mol. Sci.* **2021**, *22*, x. <https://doi.org/10.3390/xxxxx>

Academic Editor: Vytautas Smirnovas

Received: 26 February 2021  
Accepted: 22 March 2021  
Published: 24 March 2021

**Publisher's Note:** MDPI stays neutral with regard to jurisdictional claims in published maps and institutional affiliations.

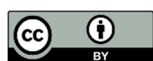

**Copyright:** © 2021 by the authors. Licensee MDPI, Basel, Switzerland. This article is an open access article distributed under the terms and conditions of the Creative Commons Attribution (CC BY) license (<http://creativecommons.org/licenses/by/4.0/>).

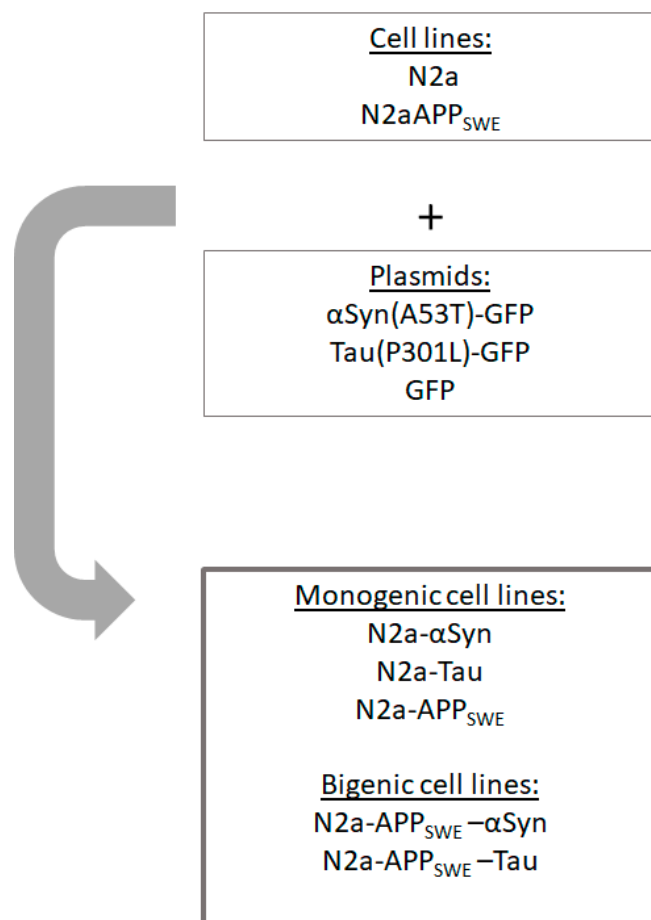

**Figure S1.** Cell models to study aggregation of amyloid proteins.

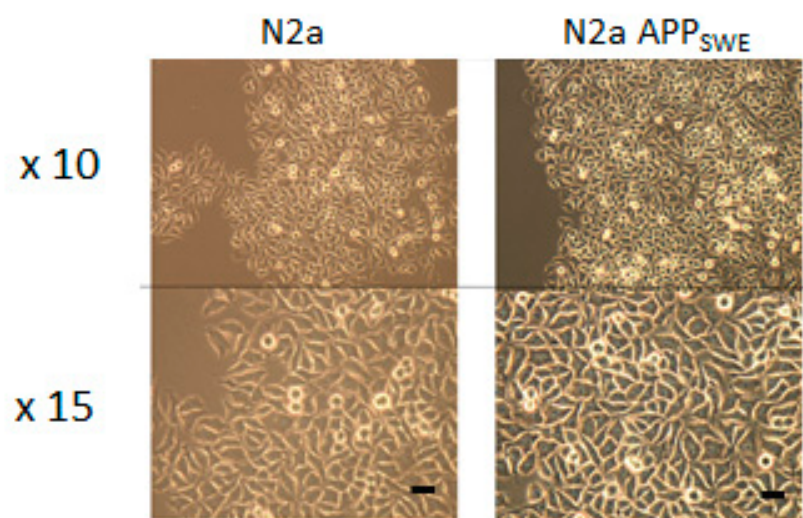

**Figure S2.** Bright field images of cells before transfection. Scale bar is 20  $\mu$ m.

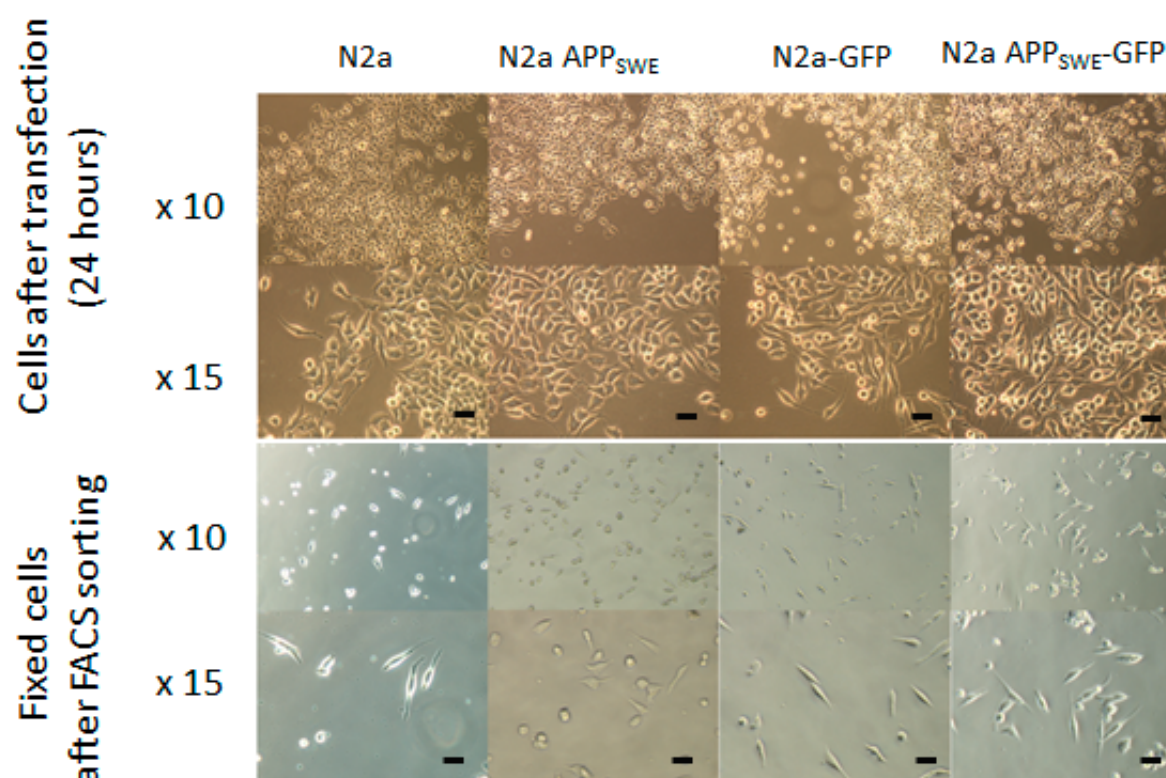

**Figure 3.** Bright-field images of cells after transfection and FACS sorting. Scale bar is 20  $\mu$ m.

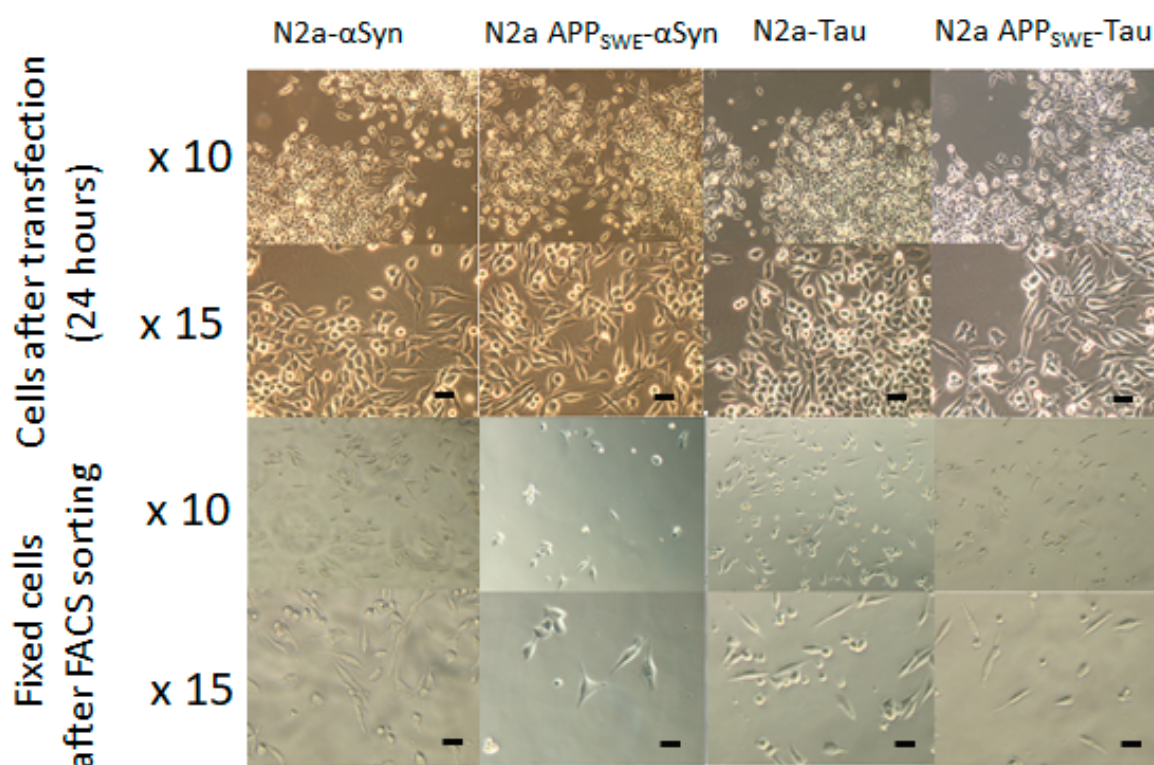

**Figure S4.** Bright-field images of cells after transfection and FACS sorting. Scale bar is 20  $\mu$ m.

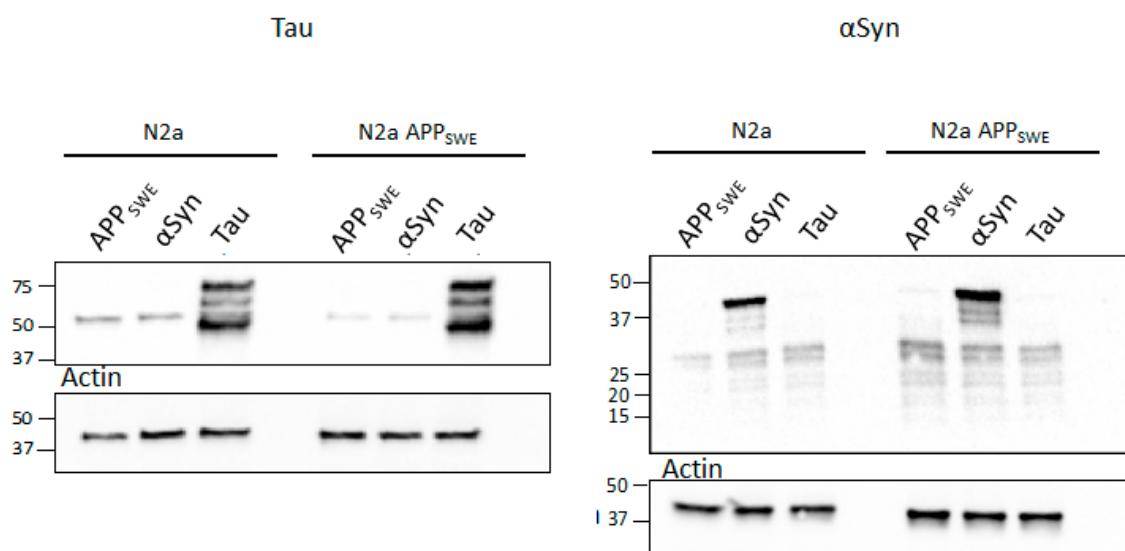

**Figure S5.** SDS PAGE followed by western blot analysis with specific antibodies against Tau and  $\alpha$ Syn expression after transfection.

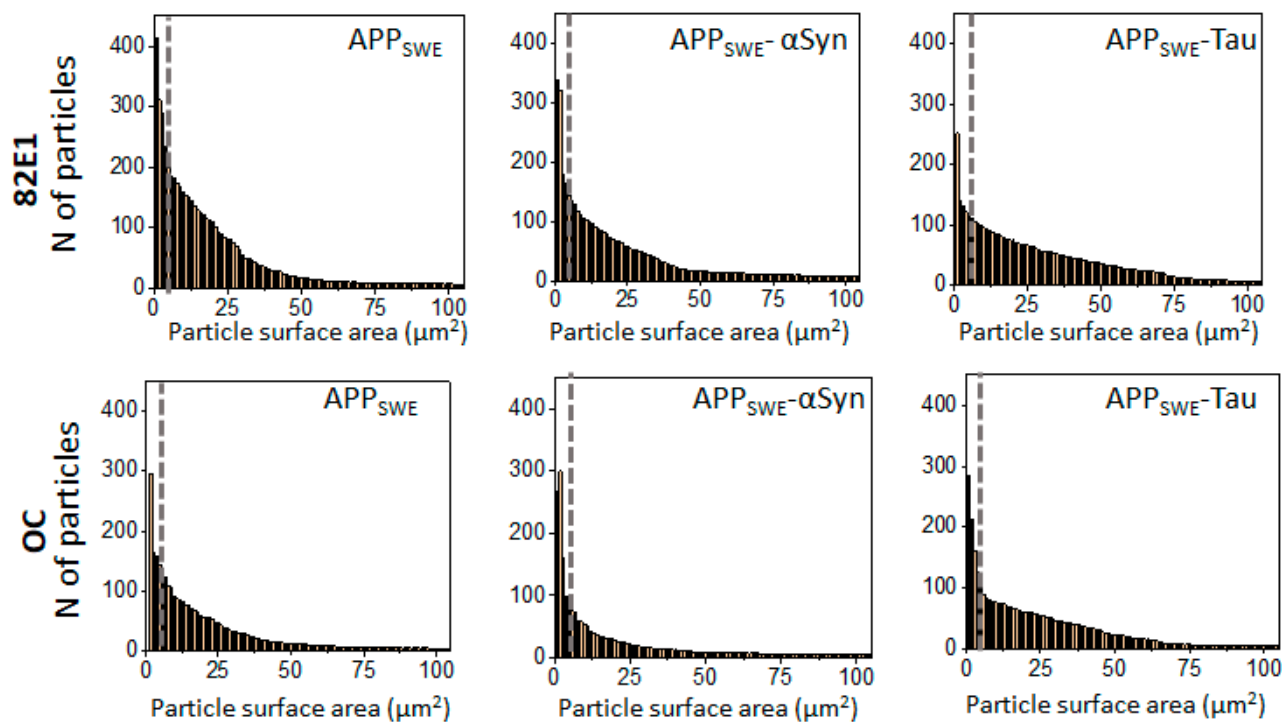

**Figure S6.** Particle size was quantified by Imaris (Bitplane Scientific Software, Zurich, Switzerland) after surface rendering in confocal images of the cells immunolabeled with antibodies OC and 82E1. Dashed lines indicate a threshold set for the analysis of rendered surfaces in confocal z-stacks that was used for the fluorescent signal quantification.
